# Supplementary material for: BRCA1/2 mutations perturb telomere biology: characterization of structural and functional abnormalities in vitro and in vivo
Source: PubMed Central journal article supplement (PMC4823046; doi:10.18632/oncotarget.5693), 2015-10-16
Supplement: oncotarget-07-2433-s001.pdf [file oncotarget-07-2433-s001.pdf]

## SUPPLEMENTARY FIGURES AND TABLE

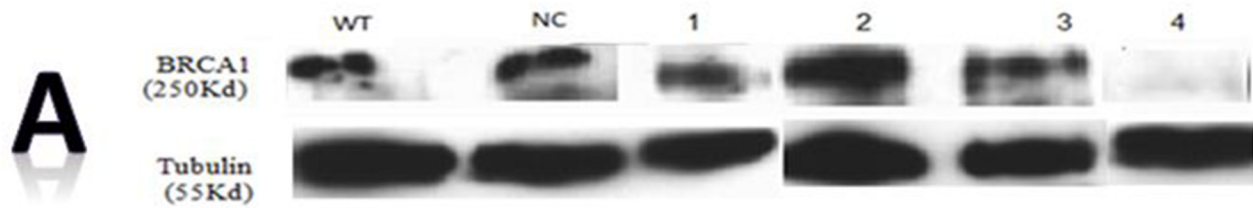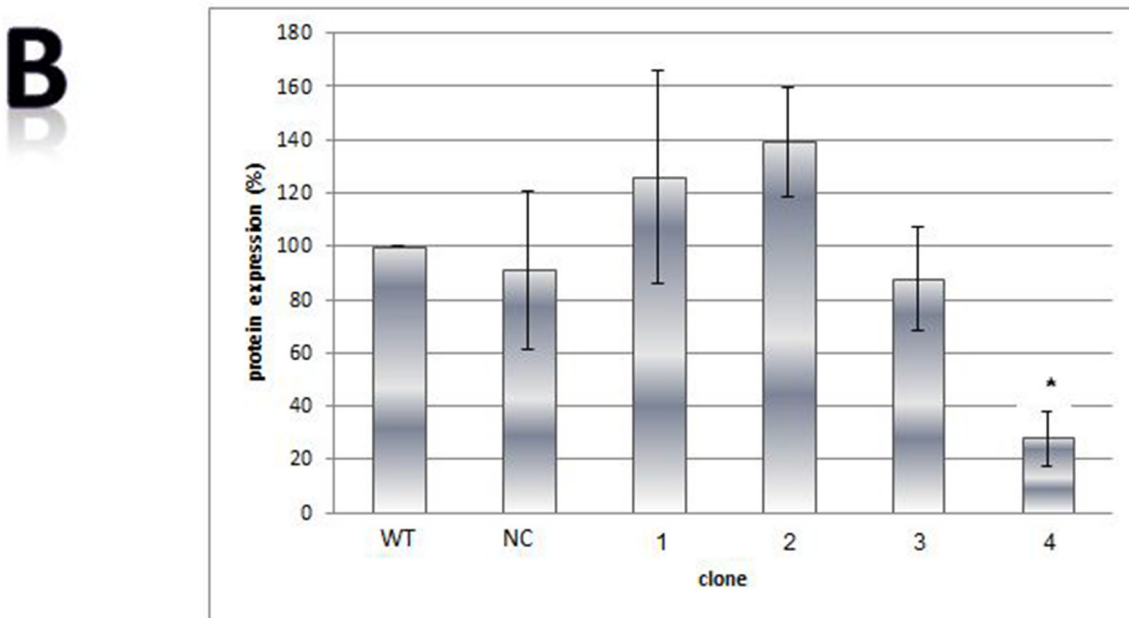

**Supplementary Figure S1: BRCA1 silencing.** **A.** An example of western blot representing BRCA1 expression of the various clones. **B.** Quantitation of A (two biological repetitions). “WT”- the wild type intact cells; “NC” depicts the cells which were transfected with the negative control ShRNA plasmid.

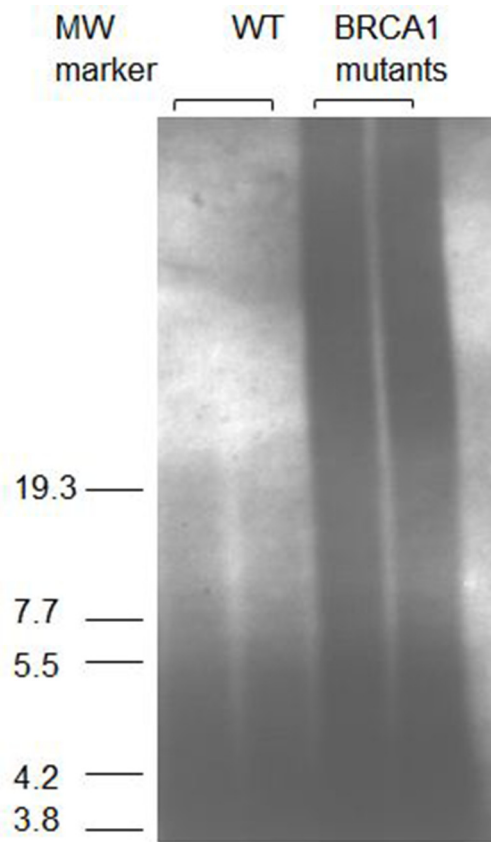

**Supplementary Figure S2: Telomere length in cell line with BRCA1 mutation.** Telomere length were measured in the wild type HB-2 cells as well as in the BRCA1 mutated cell lines by Southern blotting.

**A**

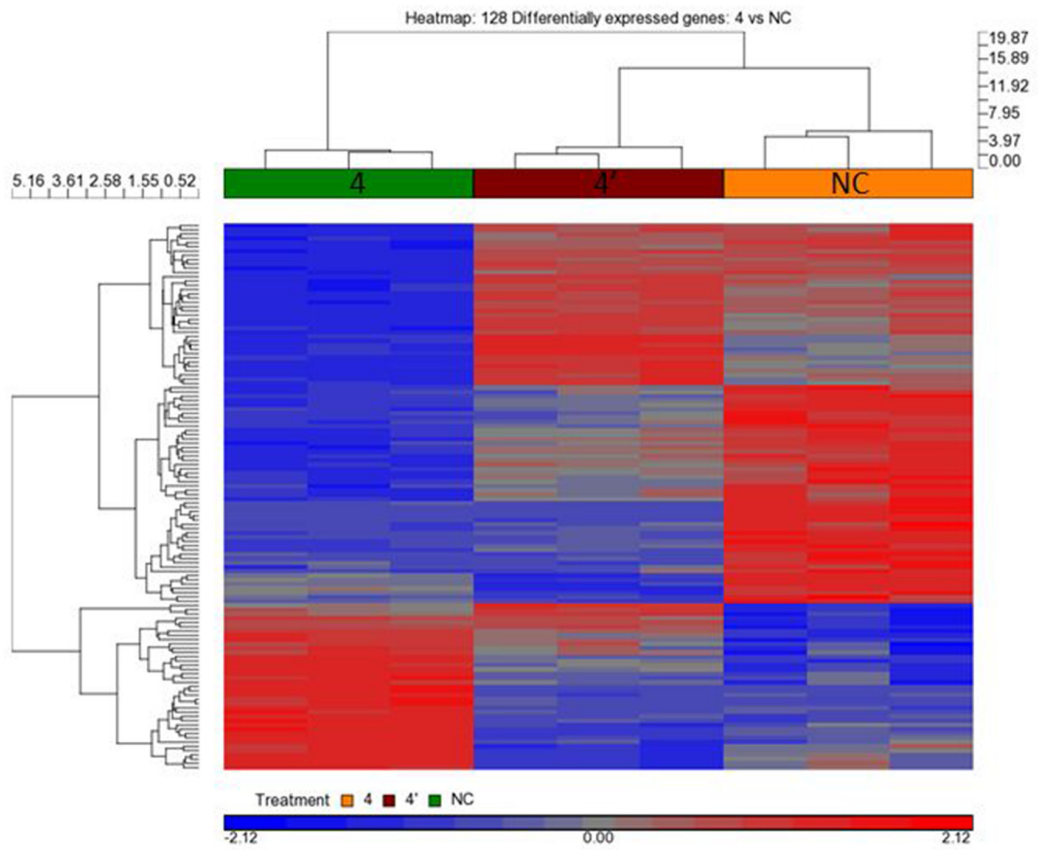

**B**

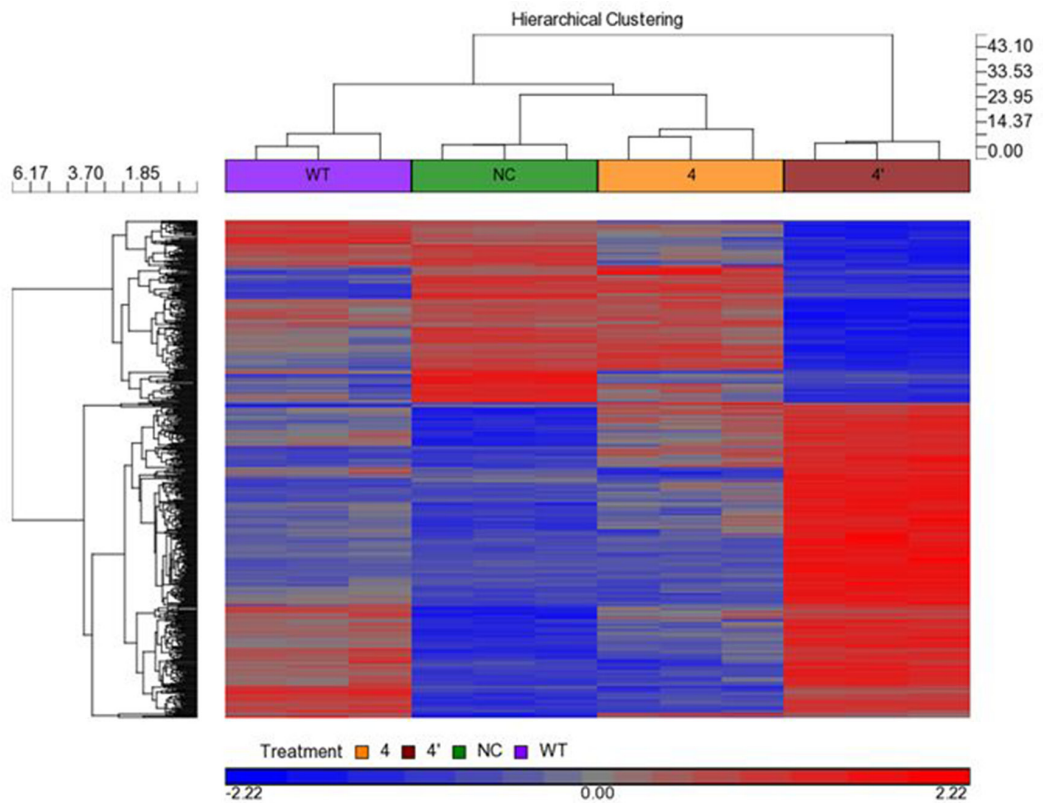

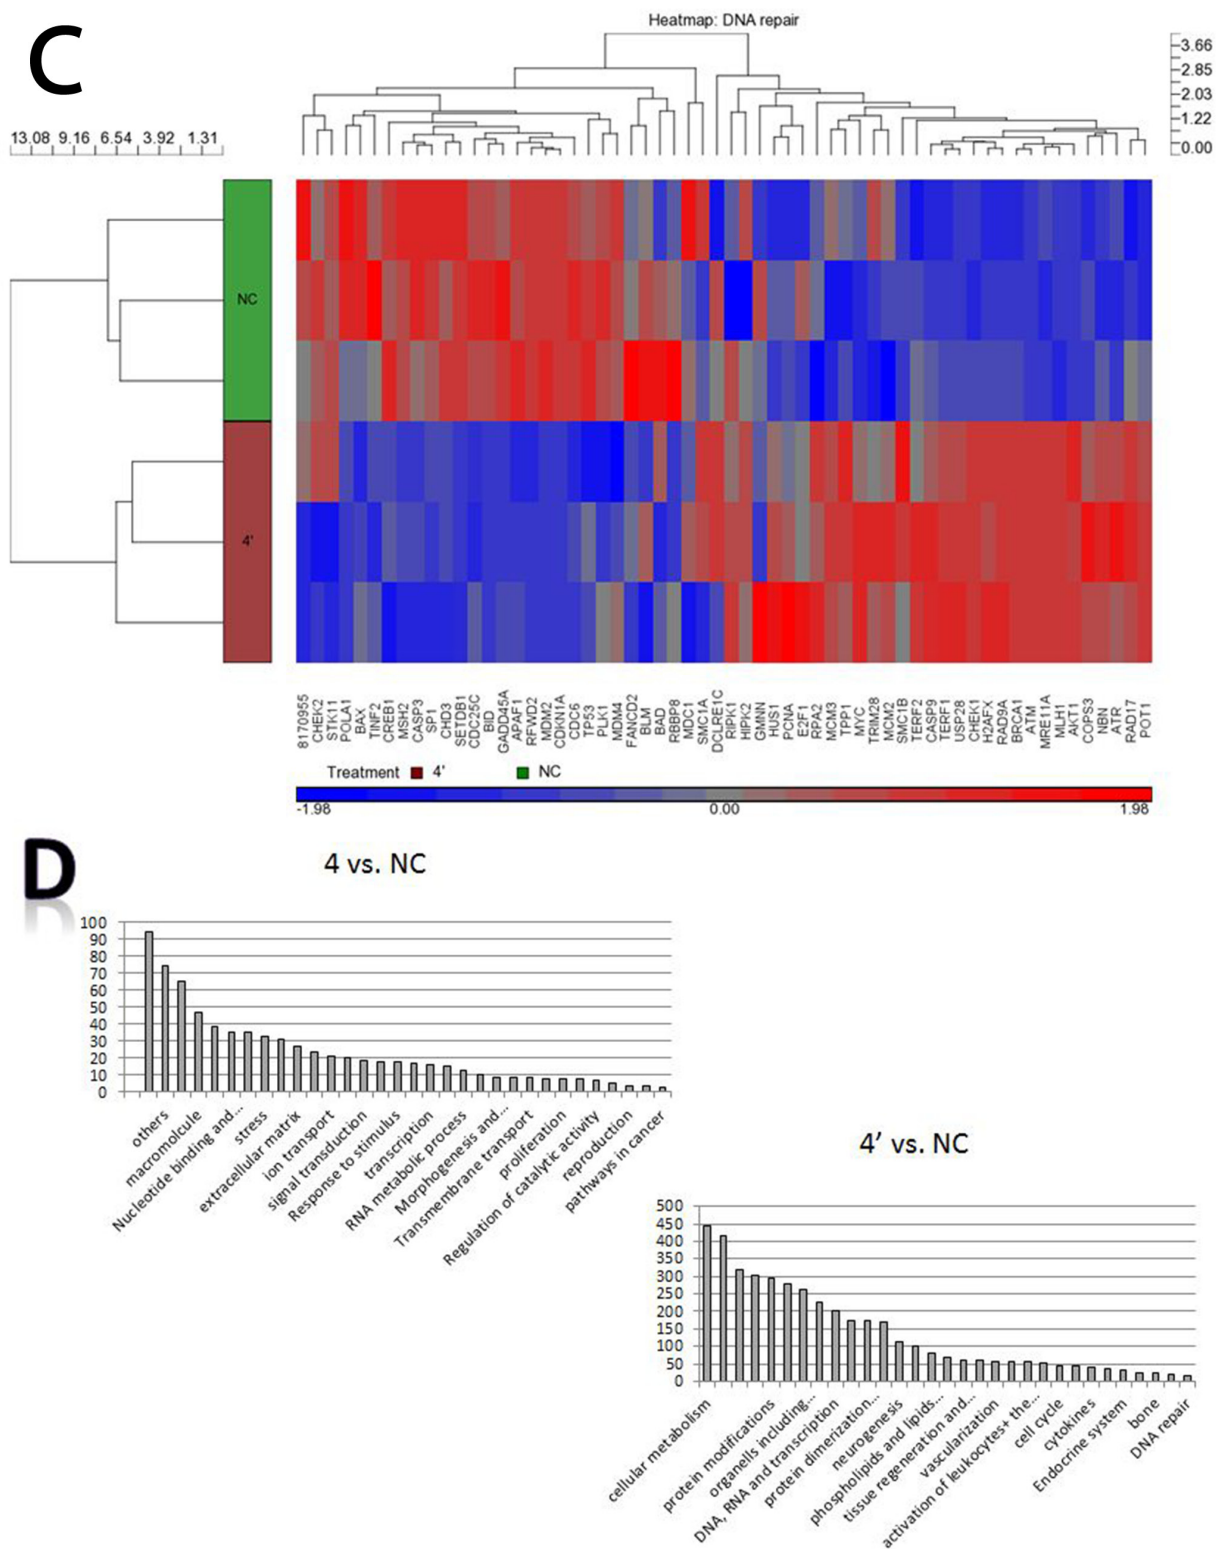

**Supplementary Figure S3: Concrete signature of expressed genes in cells following BRCA1 silencing.** A. Heat map of 128 differentially expressed genes: 4 versus NC; B. Heat map of 643 Differentially expressed genes: 4', 4, WT, NC; C. Heat map of DNA repair related genes in 4', NC; D. Gene functions in BRCA1 silenced cells and intact controls; E. Ven representation of all genes obtained with minimal cutoff of <math><0.05</math> and fold-change cutoff of 2. "WT"- the wild type intact cells; "NC" depicts the cells which were transfected with the negative control ShRNA plasmid; "4'" is clone # 4 in which BRCA1 silencing was optimal one month post ShRNA transfection. "4" is clone # 4 in which BRCA1 silencing was optimal 6 months post ShRNA transfection.

**Supplementary Table S1: Statistical parameters of telomere lengths in four chromosomal arms in the BRCA1/2 mutations carriers and controls**

|                | P1       |          | P2       |          | Q1       |          | Q2       |          |
|----------------|----------|----------|----------|----------|----------|----------|----------|----------|
|                | controls | carriers | controls | carriers | controls | carriers | controls | carriers |
| Mean           | 117991   | 88539    | 112749   | 83425    | 119423   | 86318    | 107902   | 77382    |
| Std. Error     | 15446    | 18644    | 14882    | 17703    | 15361    | 17489    | 14255    | 16203    |
| Median         | 116525   | 76703    | 115917   | 72307    | 122672   | 75309    | 105168   | 65939    |
| Std. Deviation | 46337    | 58959    | 44647    | 55982    | 46082    | 55305    | 42765    | 51238    |
| Minimum        | 33928    | 23041    | 31698    | 20061    | 31854    | 22270    | 27632    | 20287    |
| Maximum        | 179728   | 217019   | 178353   | 204061   | 181094   | 202168   | 152074   | 184792   |
